# Supplementary material for: A microRNA polycistron as a potential human oncogene
Source: Springer Nature journal article supplement (doi:10.1038/nature03552), 2005-06-01
Supplement: nature03552-s3.pdf [file nature03552-s3.pdf]

# Supplementary Table 1

## Significant Genes List

### Input Parameters

|                              |                             |
|------------------------------|-----------------------------|
| Imputation Engine            | 10-Nearest Neighbor Imputer |
| Data Type                    | Two Class, unpaired data    |
| Data in log scale?           | TRUE                        |
| Number of Permutations       | 100                         |
| Blocked Permutation?         | FALSE                       |
| RNG Seed                     | 1234567                     |
| (Delta, Fold Change)         | (0.20243, 2.00000)          |
| (Upper Cutoff, Lower Cutoff) | (1.65693, $-\infty$ )       |

### Computed Quantities

|                                                  |                      |
|--------------------------------------------------|----------------------|
| Computed Exchangeability Factor S0               | 0.085654726          |
| S0 percentile                                    | 0                    |
| False Significant Number (Median, 90 percentile) | (1.00000, 4.20000)   |
| False Discovery Rate (Median, 90 percentile)     | (16.66667, 70.00000) |
| Pi0Hat                                           | 1                    |

### 6 Positive Significant Genes

| Gene Name     | Score(d)    | Numerator(r) | Denominator(s+s0) | Fold Change | q-value (%) |
|---------------|-------------|--------------|-------------------|-------------|-------------|
| hsa-miR-92    | 2.181254144 | 1.124125     | 0.515357187       | 2.34459     | 16.6666667  |
| hsa-miR-19a   | 1.990500557 | 1.06695      | 0.53602095        | 2.12908     | 16.6666667  |
| hsa-miR-20    | 1.925478851 | 1.304075     | 0.677273084       | 2.54907     | 16.6666667  |
| hsa-miR-19b   | 1.887537933 | 1.33365      | 0.706555337       | 2.55144     | 16.6666667  |
| hsa-miR-17-5p | 1.729572125 | 1.126225     | 0.651158159       | 2.06056     | 16.6666667  |
| hsa-miR-106a  | 1.656932745 | 1.2342       | 0.744870306       | 2.29774     | 16.6666667  |

**Supplementary Table 1 Legend. Significance Analysis of Microarray (SAM) analysis of 13q31 amplicon cell lines.** The normalized, collapsed data set from Supplementary Figure 1 was used for SAM analysis using 2-fold minimum change restriction. Data was divided into two classes based on published presence of the amplicon as follows: Karpas 1618, OCI-Ly4, OCI-Ly7, OCI-Ly8 positive; Namalwa, HG1125, Jurkat, Manca, Raji, Negative. Six positive significant genes and zero negative significant genes were identified using a delta value of 0.202. The false discovery rate was 17%.
